# Supplementary material for: Development of a Chemometric Platform for Mid-Infrared Fermentation Monitoring
Source: Research Square preprint supplement (doi:10.21203/rs.3.rs-7861136/v1), 2025-11-28
Supplement: Supplementary file 1 [file 1d637dda3efaec7a4ce2718a.docx]

**Table 2**. Model parameters and fit obtained with different calibration materials (single-chemical solutions, mixtures, and fermentation broth samples) to predict glucose and citramalate concentrations. Although the majority of them present acceptable correlation coefficients, the best option after testing against an independent fermentation was a calibration model established using fermentation broth from a continuous fermentation.

| **Model Type** | **Chemical** | **Wavenumber**  **Range (cm-1)** | **Slope** | **Intercept** | **R2**  **Calibration** | **R2**  **Test** |
| --- | --- | --- | --- | --- | --- | --- |
| Single-Chemical | Glucose | 932 – 1,032 | -0.00399 | -0.15458 | 0.86 | 0.77 |
| 992 – 1,092 | 0.004195 | -0.05507 |
| Citramalate | 1,364 – 1,432 | 0.003014 | -0.00292 | 0.96 | 0.92 |
| 1,548 – 1,584 | 0.001701 | -0.0283 |
| Mixtures | Glucose | 932 – 1,032 | -0.00344 | -0.16016 | 0.95 | 0.75 |
| 992 – 1,092 | 0.004525 | -0.06149 |
| Citramalate | 1,364 – 1,432 | 0.002423 | -0.00431 | 0.99 | 0.99 |
| 1,548 – 1,584 | 0.001365 | -0.02884 |
| Fermentation  (Option 1) | Glucose | 932 – 1,032 | -0.00367 | -0.1617 | 0.86 | 0.91 |
| 992 – 1,092 | 0.00425 | -0.06683 |
| Citramalate | 1,364 – 1,432 | 0.003622 | -0.01043 | 0.28 | 0.86 |
| 1,548 – 1,584 | 0.001362 | -0.02657 |
| Fermentation  (Option 2) | Glucose | 932 – 1,032 | -0.00477 | -0.16348 | 0.34 | 0.80 |
| 992 – 1,092 | 0.00559 | -0.05927 |
| CM | 1,364 – 1,432 | 0.001672 | -0.00552 | 0.61 | 0.80 |
| 1,548 – 1,584 | 0.001379 | -0.02828 |
