# Supplementary material for: Development of a Chemometric Platform for Mid-Infrared Fermentation Monitoring
Source: Research Square preprint supplement (doi:10.21203/rs.3.rs-7861136/v1), 2025-11-28
Supplement: Supplementary file 3 [file d704942246dc5358f343f1bb.docx]

**Table 1**. Wavenumber ranges selected and subsequently optimized for quantification of each of the chemical compounds studied. Wavenumber ranges were obtained by analyzing single-chemical solutions within a concentration range (0 – 16 g L-1) to avoid interferences from other chemicals present. Not all the wavenumber ranges required optimization and hence some values remain the same.

|  | **Wavenumber Ranges (cm-1)** | |
| --- | --- | --- |
| **Initial Selection** | **After Optimization** |
| Glucose | 932 – 1,032 | 932 – 1,032 |
| 992 – 1,092 | 992 – 1,092 |
| Glycerol | 1,048 – 1,100 | 1,048 – 1,100 |
| Citramalate | 1,364 – 1,432 | 1,364 – 1,432 |
| 1,532 – 1,604 | 1,548 – 1,584 |
| Ethanol | 976 – 1,048 | 988 – 1,032 |
| 1,004 – 1,1124 | 1,028 – 1,096 |
| Lactate | 1,068 – 1,136 | 1,080 – 1,124 |
| Acetate | 1,344 – 1,416 | 1,364 – 1,392 |
| 1,376 – 1,456 | 1,404 – 1,424 |
